# Supplementary material for: Effects of Multivitamin and Multimineral Supplementation on Blood Pressure: A Meta-Analysis of 12 Randomized Controlled Trials
Source: PubMed Central journal article supplement (PMC6116168; doi:10.3390/nu10081018), 2018-08-03
Supplement: nutrients-10-01018-s001.pdf [file nutrients-10-01018-s001.pdf]

Table S1. Details of supplement used in included studies evaluating the effect of MVMS on blood pressure

| Study                   | Types of supplement    | No. of vitamins and minerals  | Details for supplement                                                                                                                                                                                                                                                                                     | Control         |
|-------------------------|------------------------|-------------------------------|------------------------------------------------------------------------------------------------------------------------------------------------------------------------------------------------------------------------------------------------------------------------------------------------------------|-----------------|
| Zureik et al.2004[10]   | Vitamins plus minerals | 5(3 vitamins + 2 minerals)    | Vitamin C, vitamin E, beta-carotene, selenium, zinc                                                                                                                                                                                                                                                        | Placebo         |
|                         |                        |                               | Vitamin A, vitamin D, vitamin E, vitamin B1, vitamin B2, vitamin B6, vitamin C, vitamin B12, vitamin K1, biotin, folic acid, niacin, pantothenic acid, calcium, phosphorus, chlorine, magnesium, iron, copper, zinc, manganese, iodine, chromium, molybdenum, selenium, nickel, stannum, silicon, vanadium | Placebo         |
| Wang et al.2009[11]     | Vitamins plus minerals | 29(13 vitamins + 16 minerals) | Vitamin A, vitamin E, vitamin B1, vitamin B2, niacin, pantothenic acid, vitamin B6, vitamin B12, vitamin D, biotin, folic acid, vitamin C, vitamin K1, calcium, magnesium, selenium, molybdenum, chromium, manganese, iron, copper, iodine, potassium, zinc                                                | Placebo         |
| Harris et al.2016 M[12] | Vitamins plus minerals | 24(13 vitamins + 11 minerals) | Vitamin A, vitamin E, vitamin B1, vitamin B2, niacin, pantothenic acid, vitamin B6, vitamin B12, vitamin D, biotin, folic acid, vitamin C, vitamin K1, calcium, magnesium, selenium, molybdenum, chromium, manganese, iron, copper, iodine, potassium, zinc                                                | Placebo         |
| Harris et al.2016 F[12] | Vitamins plus minerals | 24(13 vitamins + 11 minerals) | Water rich in calcium, magnesium, sodium, potassium, sulphur, chloride, fluoride, silicon                                                                                                                                                                                                                  | Distilled water |
| Rylander et al.2004[13] | Multimineral           | 8 minerals                    | Vitamin E, beta-carotene, vitamin C, zinc                                                                                                                                                                                                                                                                  | Placebo         |
| Galley et al.1997 H[15] | Vitamins plus minerals | 4(3 vitamins + 1 mineral)     | Vitamin E, beta-carotene, vitamin C, zinc                                                                                                                                                                                                                                                                  | Placebo         |
| Galley et al.1997 N[15] | Vitamins plus minerals | 4(3 vitamins + 1 mineral)     | Potassium, magnesium, calcium                                                                                                                                                                                                                                                                              | Placebo         |
| Sacks et al.1998[16]    | Multimineral           | 3 minerals                    | Vitamin C, vitamin E, folic acid                                                                                                                                                                                                                                                                           | Placebo         |
| Schutte et al.2004[17]  | Multivitamin           | 3 vitamins                    | Vitamin E, vitamin C, beta-carotene, zinc, selenium, copper, manganese                                                                                                                                                                                                                                     | Placebo         |
| Miller et al.1997[18]   | Vitamins plus minerals | 7(3 vitamins + 4 minerals)    |                                                                                                                                                                                                                                                                                                            |                 |

Study identities with the same first author's name and publication year indicate independent comparisons from the same study, and F indicates females, M indicates males, H indicates hypertensive subjects, and N indicates normotensive subjects.

Table S2. Details of supplement used in included studies evaluating the effect of MVMS on risk of hypertension

| Study                       | Types of supplement    | No. of vitamins and minerals  | Details for supplement                                                                                                                                                                                                                                                               | Control    |
|-----------------------------|------------------------|-------------------------------|--------------------------------------------------------------------------------------------------------------------------------------------------------------------------------------------------------------------------------------------------------------------------------------|------------|
| Mark et al.1996 M[9]        | Vitamins plus minerals | 26(13 vitamins + 13 minerals) | Beta-carotene, vitamin A, vitamin E, vitamin C, folic acid, vitamin B1, vitamin B2, niacin, vitamin B6, vitamin B12, vitamin D, biotin, pantothenic acid, calcium, phosphorus, iodine, iron, magnesium, copper, manganese, potassium, chloride, chromium, molybdenum, selenium, zinc | Placebo    |
| Mark et al.1996 F[9]        | Vitamins plus minerals | 26(13 vitamins + 13 minerals) | Beta-carotene, vitamin A, vitamin E, vitamin C, folic acid, vitamin B1, vitamin B2, niacin, vitamin B6, vitamin B12, vitamin D, biotin, pantothenic acid, calcium, phosphorus, iodine, iron, magnesium, copper, manganese, potassium, chloride, chromium, molybdenum, selenium, zinc | Placebo    |
| Chen et al.2018[14]         | Vitamins plus minerals | 15(10 vitamins + 5 minerals)  | Folic acid, vitamin A, vitamin E, vitamin D, vitamin C, vitamin B1, vitamin B2, vitamin B6, vitamin B12, niacin, zinc, copper, iodine, selenium, iron                                                                                                                                | Folic acid |
| Merchant et al.2005[19]     | Multivitamin           | 7 vitamins                    | Vitamin B1, vitamin B2, vitamin B6, vitamin B12, vitamin C, vitamin E, folic acid                                                                                                                                                                                                    | Placebo    |
| Czernichow et al.2005 M[20] | Vitamins plus minerals | 5 (3 vitamins and 2 minerals) | vitamin C, vitamin E, beta-carotene, selenium, zinc                                                                                                                                                                                                                                  | Placebo    |
| Czernichow et al.2005 F[20] | Vitamins plus minerals | 5 (3 vitamins and 2 minerals) | vitamin C, vitamin E, beta-carotene, selenium, zinc                                                                                                                                                                                                                                  | Placebo    |

Study identities with the same first author's name and publication year indicate independent comparisons from the same study, and F indicates females, M indicates males.

|                         | Random sequence generation (selection bias) | Allocation concealment (selection bias) | Blinding of participants and personnel (performance bias) | Blinding of outcome assessment (detection bias) | Incomplete outcome data (attrition bias) | Selective reporting (reporting bias) | Other bias |
|-------------------------|---------------------------------------------|-----------------------------------------|-----------------------------------------------------------|-------------------------------------------------|------------------------------------------|--------------------------------------|------------|
| Chen et al.2018         | +                                           | +                                       | +                                                         | +                                               | +                                        | +                                    | +          |
| Czernichow et al.2005 F | +                                           | +                                       | +                                                         | +                                               | +                                        | +                                    | +          |
| Czernichow et al.2005 M | +                                           | +                                       | +                                                         | +                                               | +                                        | +                                    | +          |
| Galley et al.1997 H     | +                                           | +                                       | +                                                         | +                                               | +                                        | +                                    | +          |
| Galley et al.1997 N     | +                                           | +                                       | +                                                         | +                                               | +                                        | +                                    | +          |
| Harris et al.2016 F     | +                                           | +                                       | +                                                         | +                                               | +                                        | +                                    | +          |
| Harris et al.2016 M     | +                                           | +                                       | +                                                         | +                                               | +                                        | +                                    | +          |
| Mark et al.1996 F       | +                                           | ?                                       | -                                                         | +                                               | ?                                        | +                                    | +          |
| Mark et al.1996 M       | +                                           | ?                                       | -                                                         | +                                               | ?                                        | +                                    | +          |
| Merchant et al.2005     | +                                           | +                                       | +                                                         | +                                               | ?                                        | +                                    | +          |
| Miller et al.1997       | +                                           | +                                       | -                                                         | +                                               | +                                        | +                                    | +          |
| Rylander et al.2004     | +                                           | ?                                       | +                                                         | +                                               | ?                                        | +                                    | -          |
| Sacks et al.1998        | +                                           | ?                                       | +                                                         | +                                               | +                                        | +                                    | +          |
| Schutte et al.2004      | +                                           | ?                                       | +                                                         | +                                               | +                                        | +                                    | +          |
| Wang et al.2009         | +                                           | +                                       | +                                                         | +                                               | +                                        | +                                    | +          |
| Zureik et al.2004       | +                                           | +                                       | +                                                         | +                                               | +                                        | +                                    | +          |

Figure S1. Risk of bias of included RCTs. Red, green and yellow balls indicate high risk of bias, low risk of bias and unclear risk of bias, respectively. Study identities with the same first author's name and publication year indicate independent comparisons from the same study, and F indicates females, M indicates males, H indicates hypertensive subjects, and N indicates normotensive subjects.

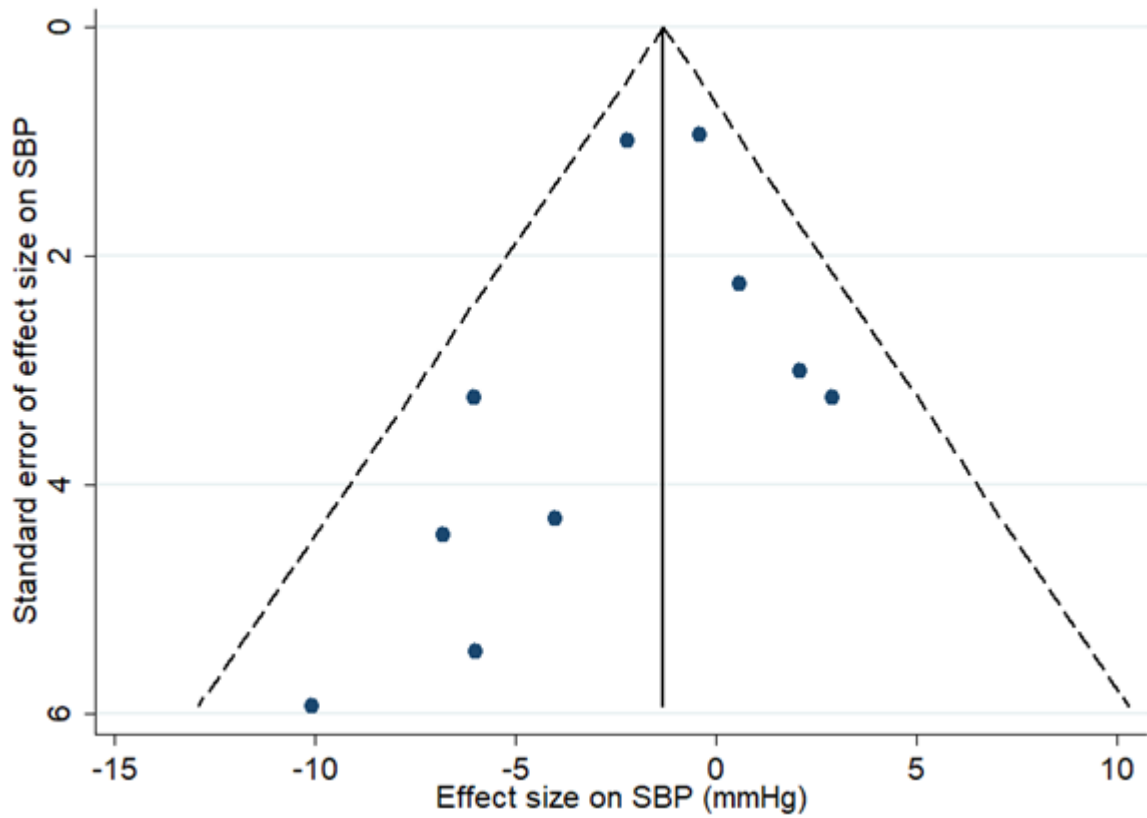

Figure S2. Funnel plot for studies evaluating the effect of multivitamin and multimineral supplementation (MVMS) on systolic blood pressure (SBP).

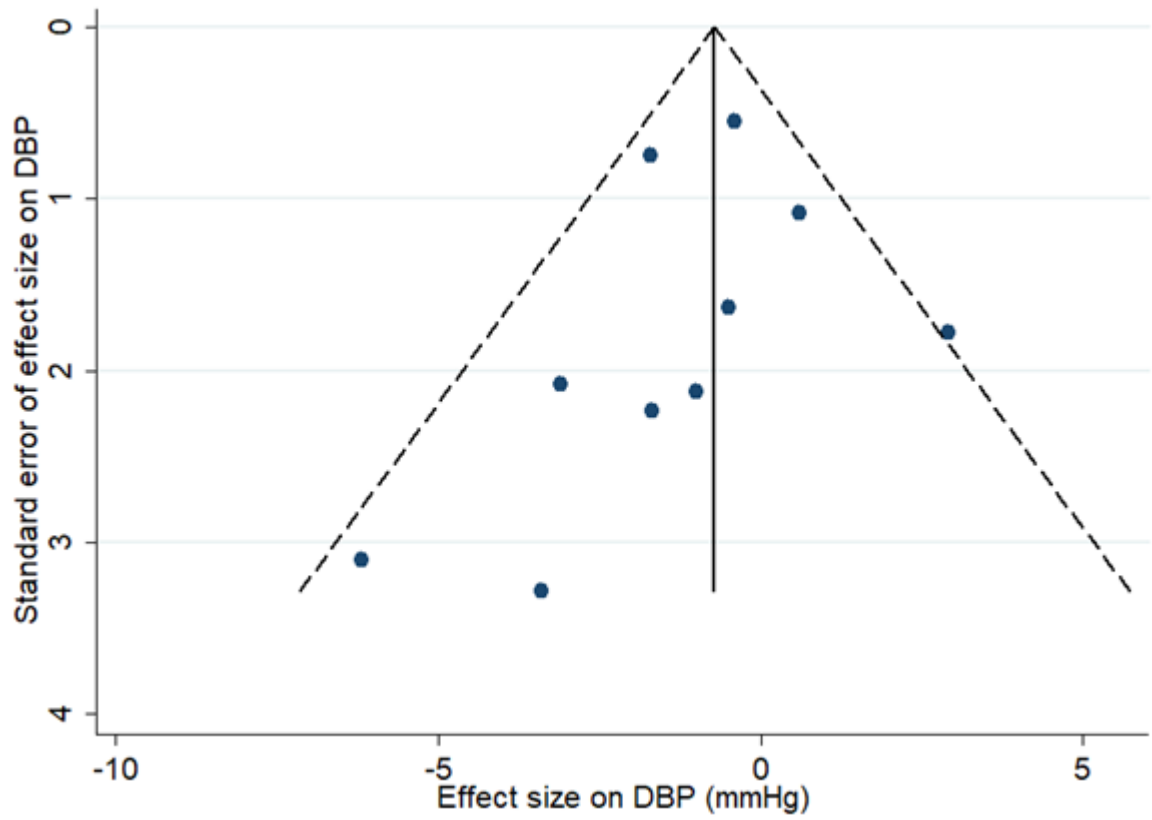

Figure S3. Funnel plot for studies evaluating the effect of multivitamin and multimineral supplementation (MVMS) on diastolic blood pressure (DBP).

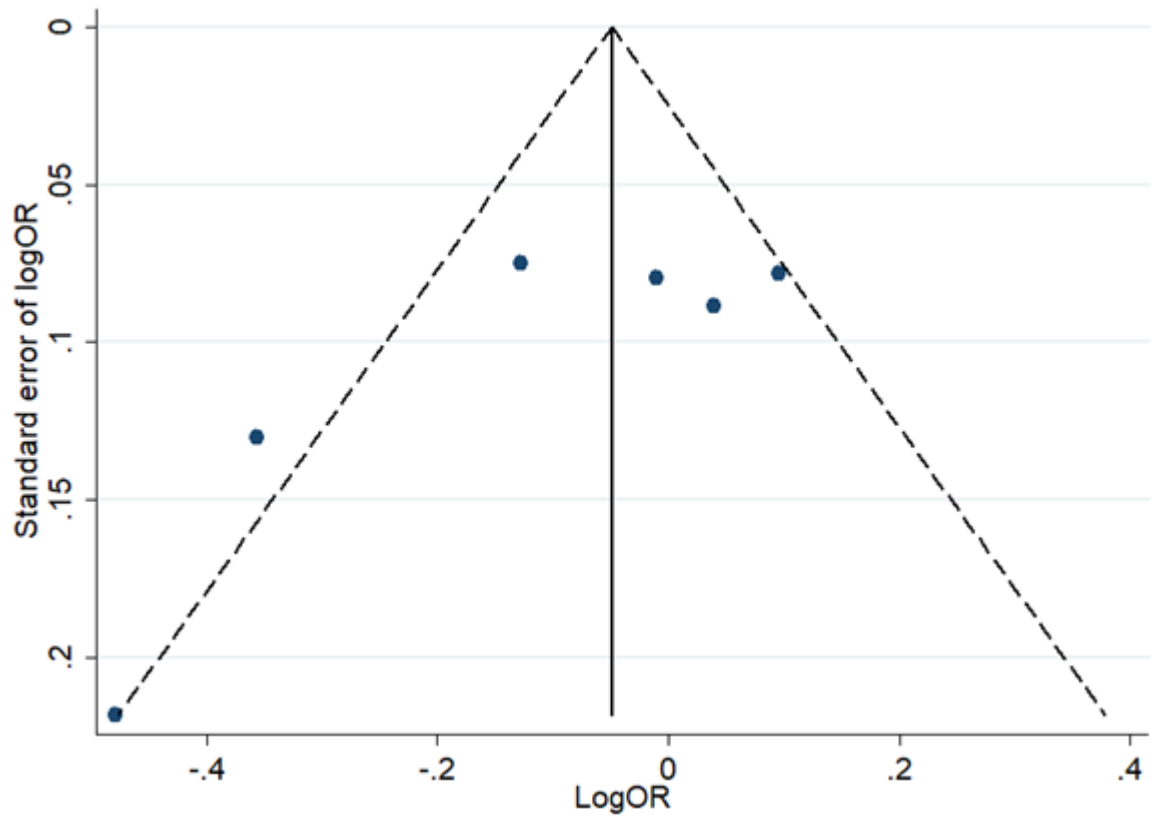

Figure S4. Funnel plot for studies evaluating the effect of multivitamin and multiminer supplementation (MVMS) on risk of hypertension. OR, odds ratio.
